# Supplementary material
Source: PubMed Central journal article supplement (PMC124362)

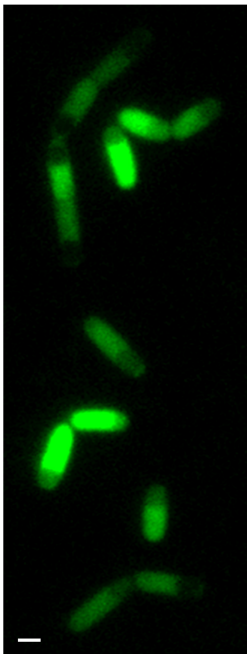

GFP

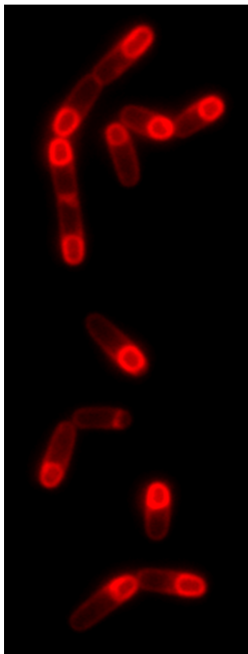

membranes

Supplement: pnas_132235899_4.pdf [file pnas_132235899_4.pdf]
